# Supplementary material for: Substantial Loss of Conserved and Gain of Novel MicroRNA Families in Flatworms
Source: PubMed Central journal article supplement — Mol Biol Evol. 2013 Sep 11;30(12):2619–28. doi: 10.1093/molbev/mst155 (PMC3840308; doi:10.1093/molbev/mst155), 2013-09-11
Supplement: supp_mst155_Supplementary_File_1.pdf [file supp_mst155_Supplementary_File_1.pdf]

**gsa-mir-1**

ENERGY = -35.4

|             |         |      |      |
|-------------|---------|------|------|
| total reads | mature  | loop | star |
| 2568546     | 2567299 | 1    | 1246 |

Bases 1 to 96

|    |        |           |        |         |       |         |
|----|--------|-----------|--------|---------|-------|---------|
|    | 10     | 20        | 30     | 40      |       |         |
| -- | C      | AA        | UUU    | -       | -     | GUU     |
|    | UCGUAC | UCGUUACAU | CCGUAA | AGAUGUU | CACAA | UCAUU \ |
|    | GGUAUG | AGCGGUGUA | GGUAUU | UUUACAA | GUGUU | AGUAA G |
| CU | A      | A-        | C--    | C       | U     | AAU     |
|    | 90     | 80        | 70     | 60      | 50    |         |

\*\*\*\*\* \*\*\* \*\*\*\*\*

|            |                        |
|------------|------------------------|
| gsa-mir-1  | TGGAATGTGGCGAAGTATGGTC |
| sja-mir-1  | TGGAATGTGGCGAAGTATGGTC |
| egr-mir-1  | TGGAATGTTGTGAAGTATGT-- |
| cte-mir-1  | TGGAATGTAAAGAAGTATGTAG |
| sme-mir-1b | TGGAATGTCGTGAATTATGGTC |

---

**gsa-mir-87**

ENERGY = -38.2

|             |        |      |      |
|-------------|--------|------|------|
| total reads | mature | loop | star |
| 319657      | 319625 | 0    | 32   |

Bases 1 to 121

|    |          |     |      |      |       |         |      |        |      |
|----|----------|-----|------|------|-------|---------|------|--------|------|
|    | 10       | 20  | 30   | 40   | 50    | 60      |      |        |      |
| -- | U AG     | UU  | UC   | UGAU | AUA   | CU      | C AA |        |      |
|    | ACGCCUGA | ACU | GCUC | ACCA | AGAGU | AGAAAGA | UUU  | GUAU G | GGAA |
|    | UGUGGACU | UGA | CGAG | UGGU | UUUCA | UUUUUCU | AAA  | CAUA C | CCUU |
| CG | U AA     | --  | --   | ---- | ---   | AU      | A GC | U      |      |
|    | 110      | 100 |      | 90   |       | 80      | 70   |        |      |

\*\*\*\*\*

|             |                      |
|-------------|----------------------|
| cte-mir-87b | GUGAGCAAAGUUUCAGGUGU |
| egr-mir-87  | GUGAGCAAAGUUUCAGGUGU |
| gsa-mir-87  | GUGAGCAAAGUUUCAGGUGU |
| lgi-mir-87  | GUGAGCAAAGUUUCAGGUGU |
| sme-mir-87a | GUGAGCAAAGUUUCAAGUGU |

---

**gsa-mir-279**

ENERGY = -21.3

|             |        |      |      |
|-------------|--------|------|------|
| total reads | mature | loop | star |
| 211059      | 210627 | 0    | 432  |

Bases 1 to 57

```

          10          20
--A      A-      UUC      UCU
      GUGAGUG  UAUUCUA  CAUGA  \
      CACUCAC  GUAAGAU  GUACU  A
CCG      GA      CA-      UAG
          50      40      30
```

\*\*\*\*\* \*\*\*\*\*

|             |                         |
|-------------|-------------------------|
| gsa-mir-279 | TGACTAGAATGAGCACTCACGCC |
| cte-mir-279 | TGACTAGA-TCCCACTCATCCA  |
| sme-mir-61a | TGACTAGAAAGTTCACTTACTGT |
| lgi-mir-279 | TGACTAGA-TCCCACTCATCCA  |
| isc-mir-279 | TGACTAGA-TCCCACTCATCCA  |

---

**gsa-mir-71a**

ENERGY = -18.5

|             |        |      |      |
|-------------|--------|------|------|
| total reads | mature | loop | star |
| 144721      | 142764 | 0    | 1957 |

Bases 1 to 55

```

      10      20
--   A   U           UAU AU
   UGAA GACA GGGUAAUGAG   C C
   ACUU CUGU CUUAUUACUC   G U
AU   C   C           UU- AA
      50      40      30
```

**gsa-mir-71a**

gsa-mir-71b

cel-mir-71

cte-mir-71

sja-mir-71a

sme-mir-71a-1

\*\*\*\*\* \*\*\* \*\*\*\*

TGAAAGACATGGGTAATGAGT

TGAAAGACTTGCGTAGTGAGA

TGAAAGACATGGGTAGTGAGA

TGAAAGACATGGGTAGTGAGA

TGAAAGACGATGGTAGTGAGA

TGAAAGACACGGGTAGTGAGA

**gsa-mir-184a**

ENERGY = -24.7

total reads **mature** loop **star**  
128624 128526 4 94  
Bases 1 to 80

```

      10      20      30      40
--      -      A  AAUCUUG      UUG
   UCUUUAACAA UUUUCGUU CAUC      UUAGGAA  \
   AGAAAUUGUU AGAGGCAG GUAG      AAUUCUU  U
CU      U      -  AAAA---      UAA
      70      60      50
```

\*\*\*\*\* \*

```
gsa-mir-184      TGGACGGAGATTTGTTAAAGATC
gsa-mir-184b     GGGACGGAAGTCTGAAAGGGAGT
cte-mir-184b    TGGACGGAGAACTGATAGGGCCC
sme-mir-748     TGGACGGAAGTGTAATGAGGGTA
sme-mir-184     TGGACGGAGGTTTGCTAAGG--A
lgi-mir-184     TGGACGGAGAACTGATAAGGGCT
```

---

gsa-mir-71b

ENERGY = -21.7

|             |        |      |      |
|-------------|--------|------|------|
| total reads | mature | loop | star |
| 127342      | 127338 | 0    | 4    |

Bases 1 to 62

```

      10      20      30
--U   A   C   U   CUAAA
   GAAAG CUUG GUAG GAGACGCU   U
   CUUUC GAAC UAUC UUCUGCGA   G
AUG   A   -   -   UACGU
  60     50     40
```

```

*****      ***  ****
gsa-mir-71a   TGAAAGACATGGGTAATGAGT
gsa-mir-71b  TGAAAGACTTGCGTAGTGAGA
cel-mir-71   TGAAAGACATGGGTTAGTGAGA
cte-mir-71   TGAAAGACATGGGTTAGTGAGA
sja-mir-71a  TGAAAGACGATGGTAGTGAGA
sme-mir-71a-1 TGAAAGACACGGGTTAGTGAGA
```

---

## gsa-mir-190

ENERGY = -23.8

|             |        |      |      |
|-------------|--------|------|------|
| total reads | mature | loop | star |
| 72813       | 72017  | 60   | 736  |

Bases 1 to 75

```

      10      20      30
--U      GG      A      GUG  UCU  AA
      GAUAUGUUU  GUUAC  AGGUGGU  UA  GCA  \
      CUAUACAAA  CAAUG  UCUACUA  GU  UGU  U
UGU      A-      A      AA-  U--  CU
      70      60      50      40
```

\*\*\*\*\* \*\* \*\* \*\*

|              |                         |
|--------------|-------------------------|
| gsa-mir-190  | TGATATGTTTGGGTTACAAGGTG |
| sja-mir-190  | TGATATGTATGGGTTACTTGGTG |
| emu-mir-190  | AGATATGTTTGGGTTACTTGGTG |
| cte-mir-190  | AGATATGTTTGGGTTACTTGGTG |
| egr-mir-190  | AGATATGTTTGGGTTACTTGGTG |
| sme-mir-190a | AGATATGTTTGG-TTAATTGGTG |

---

**gsa-mir-1175**

ENERGY = -19.0

|             |        |      |      |
|-------------|--------|------|------|
| total reads | mature | loop | star |
| 70534       | 70234  | 14   | 286  |

Bases 1 to 66

```

          10      20      30
---      -      A      U UUCACG
      GUCGGA AAGUUGAAU UCGAA UG      A
      CAGCUU UUCAACUUA AGUUU AU      U
AGU      C      G      U UCUCUU
      60      50      40
```

\*\*\*\*\* \*\* \* \*\*

|              |                         |
|--------------|-------------------------|
| gsa-mir-1175 | TGAGATTCAACTTCTTCGACTGA |
| lgi-mir-1175 | TGAGATTCAACTCCTCCAAGTGC |
| cqu-mir-1175 | TGAGATTCTACTTCTCCGACTTA |
| cte-mir-1175 | TGAGATTCAACTCCTCCAAGTGC |
| sme-mir-1175 | TGAGATTCAACTCCTCCTACTAA |

---



**gsa-mir-96a**

ENERGY = -22.2

|             |        |      |       |
|-------------|--------|------|-------|
| total reads | mature | loop | star  |
| 60906       | 50338  | 6    | 10562 |

Bases 1 to 73

```

          10      20      30
--C      U  A  AA      UAACA      UUAA
      UUGGCAC CU GG UCGUCUC      GAAUAA  \
      AAUCGUG GA CC GGCAGAG      UUUAUU  C
ACA      U  G  A-      -----      UACC
      70      60      50      40
```

```

          *****      *****      * *
gsa-mir-96      CTTGGCACTCTAGGAATCGTCTC
gsa-mir-96      CTTGGCAC-ATTGGAATTGGCAC
sme-mir-96a      TTTGGCACTTAAGGAATTGTCAC
sme-mir-96b      TTTGGCACTTAAGGAATCGTCAC
emu-mir-96      ATTGGCACTTTTGGGAATTGTCAC
cte-mir-96      CTTGGCACTGGCGGAATTATCAC
```

---

## gsa-mir-36

ENERGY = -24.9

|             |        |      |      |
|-------------|--------|------|------|
| total reads | mature | loop | star |
| 58369       | 57107  | 1    | 1261 |

Bases 1 to 95

|                                         |    |    |    |    |  |
|-----------------------------------------|----|----|----|----|--|
|                                         | 10 | 20 | 30 | 40 |  |
| -- CU - CU A GA UUAU UAAAC- U           |    |    |    |    |  |
| GG UGA UGUUU CCGGU GAUG AAU GAG CUUU U  |    |    |    |    |  |
| CC ACU ACAGA GGCCA CUAC UUAA CUC GAAA C |    |    |    |    |  |
| CA U- U UG - A- U---- UAACUU U          |    |    |    |    |  |
| 90                                      | 80 | 70 | 60 | 50 |  |

\*\*\*\*\*

|             |                         |
|-------------|-------------------------|
| gsa_mir-36  | TCACCGGGTAGACATTCATCCAC |
| sme-mir-36c | TCACCGGGTAGACATTCATTCTC |
| sme-mir-36a | TCACCGGGTAGACATTCATTATA |
| sja-mir-36  | CCACCGGGTAGACATTCATTCGC |
| sma-mir-36  | CCACCGGGTAGACATTCATTCGC |

---



## gsa-let-7

ENERGY = -32.2

|             |        |      |      |
|-------------|--------|------|------|
| total reads | mature | loop | star |
| 31964       | 31548  | 0    | 416  |

Bases 1 to 80

|    |          |               |       |      |   |
|----|----------|---------------|-------|------|---|
|    | 10       | 20            | 30    | 40   |   |
| -A | G U      | AUUACA        | UG -- | AU   |   |
|    | GAGGUAGA | UG UGUAGAGAU  | UG G  | GGGA | A |
|    | UUCCGUCU | AC ACAUCUCUAA | AC U  | UCCU | U |
| CA | A U      | G-----        | GU UU | AU   |   |
|    | 70       | 60            | 50    |      |   |

\*\*\*\*\* \* \* \*

|           |                        |
|-----------|------------------------|
| gsa-let-7 | AGAGGTAGAGTGTTGTAGAGAT |
| egr-let-7 | TGAGGTAGTGTTTCGAATGTCT |
| emu-let-7 | TGAGGTAGTGTTTCGAATGTCT |
| lgi-let-7 | TGAGGTAGTAGGTTGTATAGTT |
| sja-let-7 | GGAGGTAGTTCGTTGTGTGGTT |

---

**gsa-mir-67**

ENERGY = -21.8

|             |        |      |      |
|-------------|--------|------|------|
| total reads | mature | loop | star |
| 26840       | 23377  | 0    | 3463 |

Bases 1 to 60

```

          10      20
---      --  U      A C      UCU
      UCUCA  CAA  GGAGGUUG  G  GCAAU  \
      AGAGU  GUU  CCUCCAAC  C  UGUUG  G
AGU      UA  -      A  -      CCA
          50      40      30
```

\*\*\*\*\* \* \*\* \*\*

|             |                          |
|-------------|--------------------------|
| gsa-mir-67  | TCACAACCTCCTTGATTGAGATGA |
| cte-mir-67  | TCACAACCTGCATGAATGAGGTAA |
| lgi-mir-67  | TCACAACCTGCATGAATGAGGACA |
| sme-mir-67  | TCACAACCTCCATGAACGAGGGTA |
| isc-mir-307 | TCACAACCTCCTTGAGTGAGTGAG |

---

**gsa-mir-219**

ENERGY = -26.0

|             |        |      |      |
|-------------|--------|------|------|
| total reads | mature | loop | star |
| 25524       | 25429  | 28   | 67   |

Bases 1 to 71

|     |     |       |        |        |       |   |
|-----|-----|-------|--------|--------|-------|---|
|     | 10  | 20    | 30     |        |       |   |
| --U | U   | C     | U      | CGCCU  | CU    |   |
|     | GAU | GUCCA | UCGCAU | UCUUGU | GUUGA | U |
|     | CUA | CAGGU | AGUGUG | AGAACA | UAACU | C |
| AUU | -   | A     | U      | U----  | CU    |   |
| 70  | 60  | 50    | 40     |        |       |   |

\*\*\*\*\*

|             |                          |
|-------------|--------------------------|
| gsa-mir-219 | TGATTGTCCACTCGCATTTCTTG  |
| sme-miR-219 | TGATTGTCCATACGCAGTTCTCA  |
| cte-mir-219 | TGATTGTCCAAACGCAATTCTTG  |
| egr-mir-219 | TGATTGTCCATTTCGCATTTCTTG |
| emu-mir-219 | TGATTGTCCATTTCGCATTTCTTG |

---

**gsa-mir-2**

ENERGY = -21.5

|             |        |      |      |
|-------------|--------|------|------|
| total reads | mature | loop | star |
| 24483       | 21395  | 1    | 3087 |

Bases 1 to 62

```

          10      20      30
--  -  --    C          UA  U  U
   GUC C  GAGUG GACUGUGAUGU  UG CA G
   CAG G  UUCGU CUGACACUAUA  AC GU U
GG  U GU    C          --  -  U
 60      50      40
```

\* \* \* \* \*

|                   |                           |
|-------------------|---------------------------|
| <b>gsa-mir-2a</b> | TATCACAGTCCTGCTTTGGTGACGG |
| gsa-mir-2b        | TATCACAGCCCTGCTTGGAACGCA- |
| gsa-mir-2c        | TGTCACAGCCAATCTT-GATGTCA- |
| gsa-mir-2d        | TATCACAGCCGTGCTTTAAGGGCTT |
| egr-mir-2b        | TATCACAGCCCTGCTTGGGACACAT |
| emu-mir-2b        | TATCACAGCCCTGCTTGGGACACAT |
| sja-mir-2b        | TATCACAGCCCTGCTTGGGACACAG |
| sja-mir-2c        | TATCACAGCCGTGCTT-AAGGGCTT |

---

## gsa-mir-281

ENERGY = -23.6

|             |        |      |      |
|-------------|--------|------|------|
| total reads | mature | loop | star |
| 23203       | 20311  | 0    | 2892 |

Bases 1 to 66

```

      10      20      30
--      A   CU   --   A  CCA
  UGGAGGGCAA CUCU  UGAC  GUAA GA  A
  ACUUCUCGUU GAGG  ACUG  CAUU CU  G
AA      -   U-   UA   A  AAA
      60      50      40
```

\*\*\*\*\*

|               |                        |
|---------------|------------------------|
| gsa-mir-281   | TGTCATGGAGTTGCTCTTCAA  |
| dme-mir-281-2 | TGTCATGGAATTGCTCTCTTTG |
| lgi-mir-281   | TGTCATGGAGTTGCTCTCTTTA |
| cte-mir-281   | TGTCATGGAGTTGCTCTCTTTA |

---



**gsa-mir-96b**

ENERGY = -18.5

|             |        |      |      |
|-------------|--------|------|------|
| total reads | mature | loop | star |
| 20853       | 20607  | 0    | 246  |

Bases 1 to 55

|    |     |           |     |      |
|----|-----|-----------|-----|------|
|    | 10  | 20        |     |      |
| -C | G   | A         | G   | CAAA |
|    | UUG | CACAUUGGA | UUG | CAC  |
|    | AAC | GUGUAACUU | AAC | GUG  |
| UA | A   | A         | G   | AAAC |
|    | 50  | 40        | 30  |      |

\*\*\*\*\*      \*\*\*\*\*      \* \*

|                   |                          |
|-------------------|--------------------------|
| gsa-mir-96        | CTTGGCACTCTAGGAATCGTCTC  |
| <b>gsa-mir-96</b> | CTTGGCAC-ATTGGAATTGGCAC  |
| sme-mir-96a       | TTTGGCACTTAAGGAATTGTCAC  |
| sme-mir-96b       | TTTGGCACTTAAGGAATCGTCAC  |
| emu-mir-96        | ATTGGCACTTTTGGGAATTGTCAC |
| cte-mir-96        | CTTGGCACTGGCGGAATTATCAC  |

---

gsa-mir-2b

ENERGY = -18.7

|             |        |      |      |
|-------------|--------|------|------|
| total reads | mature | loop | star |
| 20616       | 20268  | 87   | 261  |

Bases 1 to 66

```

      10      20      30
--A  G  --      U  AUUUCAUU
   GUU CAAGC  GGUUGU  AUAUA      U
   CAA GUUCG  CCGACA  UAUAU      U
ACG  G  UC      C  AACUUAUU
      60      50      40
```

\* \* \* \* \*

|                   |                           |
|-------------------|---------------------------|
| gsa-mir-2a        | TATCACAGTCCTGCTTTGGTGACGG |
| <b>gsa-mir-2b</b> | TATCACAGCCCTGCTTGGAACGCA- |
| gsa-mir-2c        | TGTCACAGCCAATCTT-GATGTCA- |
| gsa-mir-2d        | TATCACAGCCGTGCTTTAAGGGCTT |
| egr-mir-2b        | TATCACAGCCCTGCTTGGGACACAT |
| emu-mir-2b        | TATCACAGCCCTGCTTGGGACACAT |
| sja-mir-2b        | TATCACAGCCCTGCTTGGGACACAG |
| sja-mir-2c        | TATCACAGCCGTGCTT-AAGGGCTT |

---

**gsa-mir-124a**

ENERGY = -19.1

total reads **mature** loop **star**  
17932 16594 35 1303

Bases 1 to 68

```
      10      20      30
      U A AA      GGA      AAU
GGUAUUU CC CG GUCUUA AGUUGAA A
CCAUAAG GG GC CGGAAU UCAAUUU A
      U C A-      ---      AUAA
      60      50      40
```

\*\*\*\*\*

```
gsa-mir-124a TAAGGCACGCGGTGAATACC
gsa-mir-124b TAAGGCACGCGGTGAATATC
egr-mir-124a TAAGGCACGCGGTGAATGCC
egr-mir-124b TAAGGCACGCGGTGAATACC
emu-mir-124a TAAGGCACGCGGTGAATGCC
emu-mir-124b TAAGGCACGCGGTGAATACC
sme-mir-124a TAAGGCACGCGGTGAATGCT
```

---

**gsa-mir-2c**

ENERGY = -19.6

|             |               |      |             |
|-------------|---------------|------|-------------|
| total reads | <b>mature</b> | loop | <b>star</b> |
| 15314       | 15300         | 0    | 14          |

Bases 1 to 61

```
          10          20          30
-         UC          CAA UAA  AA
  GGCAUUAA AUUGGCUG  A   UGU  \
  CUGUAGUU UAACCGAC  U   ACG  G
A         C-          AC- GUAA  AU
60         50         40
```

\* \* \* \* \*

```
gsa-mir-2a      TATCACAGTCCTGCTTTGGTGACGG
gsa-mir-2b      TATCACAGCCCTGCTTGGAACGCA-
gsa-mir-2c     TGTCACAGCCAATCTT-GATGTCA-
gsa-mir-2d      TATCACAGCCGTGCTTTAAGGGCTT
egr-mir-2b      TATCACAGCCCTGCTTGGGACACAT
emu-mir-2b      TATCACAGCCCTGCTTGGGACACAT
sja-mir-2b      TATCACAGCCCTGCTTGGGACACAG
sja-mir-2c      TATCACAGCCGTGCTT-AAGGGCTT
```

---

**gsa-mir-10a**

ENERGY = -18.8

|             |        |      |      |
|-------------|--------|------|------|
| total reads | mature | loop | star |
| 14955       | 14372  | 0    | 583  |

Bases 1 to 57

```

      10      20
--  G  A GA  G  C  A
    GAC CUGU G UCGAAU UUAC UU A
    CUG GACA C AGCUUA AAUG AA A
UG  G  A UG  -  A  U
      50      40      30
```

```

                    ****  **  *  ****
gsa-mir-10a      TAAATTCGAGTCAACAGGGTC
gsa-mir-10b      TAAATTCGGGTCTACAGGGTT
cte-miR-10a     CAAATCCGGA ACTACAGGGTA
egr-miR-10      CAAACTCGGGTCTACAGGGTG
emu-miR-10      CAAACTCGGGTCTACAGGGTG
lgi-miR-10      CAAATTCGGATCTACAGGGTA
```

---

**gsa-mir-2001**

ENERGY = -22.2

|             |        |      |      |
|-------------|--------|------|------|
| total reads | mature | loop | star |
| 13575       | 13368  | 11   | 196  |

Bases 1 to 72

|    |      |       |     |          |       |   |
|----|------|-------|-----|----------|-------|---|
|    | 10   | 20    | 30  |          |       |   |
| -- | G    | UU    | U   | CACAAGAU | UGA   |   |
|    | UUGU | ACCGU | UAA | AGGCCA   | UUGAA | A |
|    | AACA | UGGCA | AUU | UCCGGU   | AACUU | C |
| GU | A    | CU    | U   | -----    | CAA   |   |
| 70 | 60   | 50    | 40  |          |       |   |

\*\*\*\*\* \*\* \*

|              |                        |
|--------------|------------------------|
| gsa-mir-2001 | TTGTGACCGTTTTAATAGGCCA |
| cte-mir-2001 | TTGTGACCGTTATAATGGGC-A |
| lgi-mir-2001 | TTGTGACCGTTATAATGGGC-A |
| sko-mir-2001 | TTGTGACCGTTATAATGGGC-A |
| isc-mir-2001 | TTGTGACCGTTACAATGGGC-A |

---

**gsa-mir-7**

ENERGY = -23.4

total reads **mature** loop **star**  
12811 12345 1 465

Bases 1 to 78

```

      10      20      30      40
--U      C  U  U  A      CGAACUAU      C UA
      GGAAGA UUG GAU G GUUGUUU      AUACUC C \
      CCUUCU AAC CUA C CAACAAG      UAUGAG G U
AAG      U  -  -  -      -----      A CA
      70      60      50
```

\*\*\*\*\* \*\* \*

```
gsa-mir-7      TGGAAGACTTGTGATTGAGTTGTT
sme-mir-7c     TGGAAGACTGATGATTTGCTGTAA
sme-mir-7b     TGGAAGACTGTCGATTTGTTGTC
sja-mir-7      TGGAAGACTGGTGATATGTTGTTG
emu-mir-7      TGGAAGACTGGTGATATGTTGTAA
egr-mir-7      TGGAAGACTGGTGATATGTTGTAA
```

---

**gsa-mir-8**

ENERGY = -14.5

|             |        |      |   |      |
|-------------|--------|------|---|------|
| total reads | mature | loop |   | star |
| 12420       | 12323  |      | 0 | 97   |

Bases 1 to 60

|    |        |              |       |   |
|----|--------|--------------|-------|---|
|    | 10     | 20           |       |   |
| -- | U      | U            | AAA   |   |
|    | AGUCUU | AAUGAUGGUAUU | AAUUG | U |
|    | UUAGAA | UUAUUGUCAUAA | UUAAU | U |
| CU | U      | U            | AAG   |   |
|    | 50     | 40           | 30    |   |

|            |                          |             |   |
|------------|--------------------------|-------------|---|
|            | *****                    | * * **      | * |
| gsa-mir-8  | TAATACTGTTA              | -TTTAAGATTC |   |
| sme-miR-8a | TAATACTGTCAGGTAACGATGCC  |             |   |
| sja-miR-8  | TAATACTGTTAGGTAAAGATGCC  |             |   |
| sma-miR-8  | TAATACTGTTAGGTAAAGATGCC  |             |   |
| egr-miR-8  | TAATACTGTTTCGGTTAGGACGCC |             |   |
| emu-miR-8  | TAATACTGTTTCGGTTAGGACGCC |             |   |

---



**gsa-mir-76**

ENERGY = -15.9

|             |        |      |      |
|-------------|--------|------|------|
| total reads | mature | loop | star |
| 9896        | 9753   | 50   | 93   |

Bases 1 to 62

|         |            |    |    |      |
|---------|------------|----|----|------|
|         | 10         | 20 | 30 |      |
| -A      | A-         | U  | GA | UAAA |
| UUGUUUU | UCAAUAACGA | UA | UC | \    |
| AACAAAA | AGUUGUUGCU | AU | AG | U    |
| AG      | AA         | U  | A- | UUUA |
| 60      | 50         | 40 |    |      |

\*\*\*\*\* \*\*

|             |                        |
|-------------|------------------------|
| gsa-mir-76  | TTCGTTGTTGAAAAAACAAGA  |
| sme-mir-76  | TTCGTTGTTTATGAATGAGAGA |
| cte-mir-981 | TTCGTTGTCGTCGAAACCTGCT |
| dpu-mir-981 | TTCGTTGTCGACGAAACCTGCA |
| lgi-mir-981 | TTCGTTGTCGACGAAACCTGCC |

---

**gsa-mir-9**

ENERGY = -28.1

|             |        |      |      |
|-------------|--------|------|------|
| total reads | mature | loop | star |
| 8092        | 8066   | 1    | 25   |

Bases 1 to 101

```

      10      20      30      40      50
--      CUU      -      UGCAAUAAAGA      AUAAU      ACC
      UCUUUGGUUUU      UAGCUG      UGUGAU      CACUAUU      UGG      U
      AGAAAUCAAAG      AUUGAC      AUACUA      GUGAUAA      ACC      C
AA      ---      U      -----      CUUCU      CGA
      90      80      70      60
```

\*\*\*\*\* \*\* \*\*\*\*\* \*\*

```
gsa-mir-9      TCTTTGGTTTTCTTTAGCTGTGTGA
egr-mir-9      TCTTTGGTTATCT--AGCTGTGTGA
emu-mir-9      TCTTTGGTTATCT--AGCTGTGTGA
lgi-mir-9      TCTTTGGTTATCT--AGCTGTATGA
sme-mir-9a     TCTTTGGTTTTCT--AGCTGTATGA
```

---

**gsa-bantam**

ENERGY = -28.0

|             |        |      |      |
|-------------|--------|------|------|
| total reads | mature | loop | star |
| 7837        | 4095   | 0    | 3742 |

Bases 1 to 80

|       |          |     |             |        |       |
|-------|----------|-----|-------------|--------|-------|
|       | 10       | 20  | 30          | 40     |       |
|       | UCA      | G   | UUAUGAAAUGC | AG     | UU    |
| GCGGU | UGUGAUCU | AGA |             | UGAGAG | GG C  |
| CGUUA | ACACUAGA | UCU |             | ACUCUC | CU A  |
| GU    | UUC      | G   | U-----      |        | CU UU |
|       | 70       | 60  |             | 50     |       |

|            |                        |   |   |    |   |
|------------|------------------------|---|---|----|---|
|            | *****                  | * | * | ** | * |
| gsa-bantam | TGAGATCACACTTATTGCTGAT |   |   |    |   |
| sme-bantam | TGAGATCATTATGAAAGCTTTT |   |   |    |   |
| sja-bantam | TGAGATCGCGATTAAAGCTGGT |   |   |    |   |
| isc-bantam | TGAGATCATTGTGAAAGCTGAT |   |   |    |   |
| cte-bantam | TGAGATCATTGTGAAAATAAT  |   |   |    |   |

---

**gsa-mir-124b**

ENERGY = -22.8

|             |        |      |      |
|-------------|--------|------|------|
| total reads | mature | loop | star |
| 7625        | 5748   | 0    | 1877 |

Bases 1 to 56

```
          10      20
-          GG      UU GU
  GUGUUUACCGUG  GUCUUGAU  G  U
  UAUAAGUGGCGC  CGGAAUUA  U  G
C              A-      UU AU
          50      40      30
```

\*\*\*\*\*

|                     |                      |
|---------------------|----------------------|
| gsa-mir-124a        | TAAGGCACGCGGTGAATACC |
| <b>gsa-mir-124b</b> | TAAGGCACGCGGTGAATATC |
| egr-mir-124a        | TAAGGCACGCGGTGAATGCC |
| egr-mir-124b        | TAAGGCACGCGGTGAATACC |
| emu-mir-124a        | TAAGGCACGCGGTGAATGCC |
| emu-mir-124b        | TAAGGCACGCGGTGAATACC |
| sme-mir-124a        | TAAGGCACGCGGTGAATGCT |

---

**gsa-mir-278**

ENERGY = -21.6

|             |        |      |      |
|-------------|--------|------|------|
| total reads | mature | loop | star |
| 7509        | 7493   | 0    | 16   |

Bases 1 to 61

|    |          |      |      |        |   |
|----|----------|------|------|--------|---|
|    | 10       | 20   | 30   |        |   |
| -- | C        | A    | CUA  | CAA    |   |
|    | ACAAGGGU | CUUC | ACCG | AGUACC | C |
|    | UGUUUUUA | GAGG | UGGC | UCAUGG | A |
| CA | U        | G    | ---  | UUU    |   |
| 60 | 50       |      | 40   |        |   |

\*\*\*\*\* \* \* \*

|             |                         |
|-------------|-------------------------|
| gsa-mir-278 | CUCGGUGGGAGUAUU-UUUGUAC |
| sme-mir-278 | CUCGGUGGGAGUAACAUCGAAA  |
| dme-mir-278 | GUCGGUGGGACUUUCGUCCGUUU |
| lgi-mir-278 | AUCGGUGGGACUUUCGUUCGUCU |
| cte-mir-278 | AUCGGUGGGACUUUCGUUCGUUC |

---

**gsa-mir-277a**

ENERGY = -15.0

|             |        |      |      |
|-------------|--------|------|------|
| total reads | mature | loop | star |
| 7319        | 7166   | 0    | 153  |

Bases 1 to 59

```

          10      20
-- -   UUU-           UU  AA
   GA GCCA   CUUUGUGUUUGUA  GA  \
   CU UGGU   GAAACGUAAAU  CU  A
UA  A   CUAU           --  GU
          50      40      30
```

```

          *****   * *   *
gsa_mir_277a      TAAATGCAAAGTATCTGGTATCAT
gsa_mir_277b      TAAATGCATGTTTTTGTCTATAC-
sja-mir-277      TAAATGCATTTTCTGGCCCGTAAC
sme-mir-277a     TAAATGCAC--TATCGGATATGAC
egr-mir-277      TAAATGCATTTTCTGGCCCGTAAC
emu-mir-277      TAAATGCATTTTCTGGCCCGTAAC
```

---

**gsa-mir-2d**

ENERGY = -26.6

|             |        |      |      |
|-------------|--------|------|------|
| total reads | mature | loop | star |
| 6371        | 3028   | 0    | 3343 |

Bases 1 to 62

```

          10      20
--A      ---  U  G          UC  AU
      CCCUU  GC CGG UGUGAUGUG  UA  \
      GGGAA  CG GCC ACACUAUAC  AU  G
UUC      UUU  U  G          UA  UA
 60      50      40      30
```

\* \* \* \* \*

|                   |                           |
|-------------------|---------------------------|
| gsa-mir-2a        | TATCACAGTCCTGCTTTGGTGACGG |
| gsa-mir-2b        | TATCACAGCCCTGCTTGGAACGCA- |
| gsa-mir-2c        | TGTCACAGCCAATCTT-GATGTCA- |
| <b>gsa-mir-2d</b> | TATCACAGCCGTGCTTTAAGGGCTT |
| egr-mir-2b        | TATCACAGCCCTGCTTGGGACACAT |
| emu-mir-2b        | TATCACAGCCCTGCTTGGGACACAT |
| sja-mir-2b        | TATCACAGCCCTGCTTGGGACACAG |
| sja-mir-2c        | TATCACAGCCGTGCTT-AAGGGCTT |

---

**gsa-mir-1993**

ENERGY = -15.4

|             |        |      |      |
|-------------|--------|------|------|
| total reads | mature | loop | star |
| 5722        | 5586   | 12   | 124  |

Bases 1 to 64

```

      10      20      30
--      AAC      C      GUUAA      UUA
      AGUGGAA      UUGCAUAA      UACA      AGA      \
      UCACUUU      AACGUAUU      AUGU      UCU      U
GC      AU-      -      -----      UAU
      60      50      40
```

```

*****      ****
gsa-mir-1993      TATTATGCAATATTTCACTCG
emu-mir-2162      TATTATGCAACTTTTCACTCC
sme-mir-1993      TATTATGCTGTTATTCATGAG
sja-mir-2162      TATTATGCAACGTTTCACTCT
sme-mir-2162      TATTATGCAAATATTCACAAT
```

---



**gsa-mir-184b**

ENERGY = -25.1

|             |        |      |      |
|-------------|--------|------|------|
| total reads | mature | loop | star |
| 5236        | 5149   | 0    | 87   |

Bases 1 to 62

|             |        |     |       |
|-------------|--------|-----|-------|
| 10          | 20     | 30  |       |
| A           | A      | G   | AAGUC |
| AUUCUUUUUCA | AUUUCC | UCC | GU A  |
| UGAGGGAAAGU | UGAAGG | AGG | CA A  |
| C           | C      | G   | AUACA |
| 60          | 50     | 40  |       |

\*\*\*\*\* \*

|                     |                         |
|---------------------|-------------------------|
| gsa-mir-184         | TGGACGGAGATTTGTTAAAGATC |
| <b>gsa-mir-184b</b> | GGGACGGAAGTCTGAAAGGGAGT |
| cte-mir-184b        | TGGACGGAGAACTGATAGGGCCC |
| sme-mir-748         | TGGACGGAAGTGTAATGAGGGTA |
| sme-mir-184         | TGGACGGAGGTTTGCTAAGG--A |
| lgi-mir-184         | TGGACGGAGAACTGATAAGGGCT |

---

**gsa-mir-993 (mir-10)**

ENERGY = -27.4

|             |        |      |      |
|-------------|--------|------|------|
| total reads | mature | loop | star |
| 5032        | 2921   | 0    | 2111 |

Bases 1 to 60

```

--      10      20
      U      G      GUUU
AUCUGUAU CUUGAGCUU UGGUU  A
UGGACAUA GAGCUCGAA AUCAA  A
CU      C      G      AUUU
      50      40      30
```

```

*****      *****
gsa-mir-993      AGAAGCTCGAGCATAACAGGTTC
api-mir-993      AGAAGCTCGTCTCTACAGGTAT
bmo-mir-993a     AGAAGCTCGTCTCTACAGGTAT
cte-mir-993      AGAAGCTCTGTTCTACAGGTAT
dme-mir-993      AGAAGCTCGTCTCTACAGGTAT
```

---

**gsa-lin-4 (mir-10)**

ENERGY = -21.8

|             |        |      |      |
|-------------|--------|------|------|
| total reads | mature | loop | star |
| 4914        | 4674   | 0    | 240  |

Bases 1 to 60

|         |               |       |    |
|---------|---------------|-------|----|
|         | 10            | 20    |    |
| --AC    | C             | CGCAU |    |
| CCUGAGU | AGAAAAACGUUUU | U     |    |
| GGACUCA | UUUUUUUGCAGAA | U     |    |
| AUAC    | C             | AAUCC |    |
|         | 50            | 40    | 30 |

\*\*\*\*\* \*

|              |                        |
|--------------|------------------------|
| gsa-lin-4    | ACCCTGAGTCAGAAAAACGTTT |
| sme-lin-4    | TCCCTGAGACC-TTCGACTGTG |
| emu-mir-125  | TCCCTGAGACCCTAGAGTTGT- |
| egr-mir-125  | TCCCTGAGACCCTAGAGTTGT- |
| sja-mir-125a | TCCCTGAGACCCTTTGATTGTC |
| sma-mir-125a | TCCCTGAGACCCTTTGATTGCC |

---

## gsa-mir-10b

ENERGY = -15.7

|             |        |      |      |
|-------------|--------|------|------|
| total reads | mature | loop | star |
| 4500        | 4283   | 0    | 217  |

Bases 1 to 60

```

      10      20
--A  C   GA C  A      G--  G
   ACC UGUA C CGA UUUGAU  AU A
   UGG ACAU G GCU AAACUA  UA A
AUA  A   UC A  A      AAG  A
      50      40      30
```

```

          ****  **  *  ****
gsa-mir-10a      TAAATTCGAGTCAACAGGGTC
gsa-mir-10b     TAAATTCGGGTCTACAGGGTT
cte-miR-10a     CAAATCCGGA ACTACAGGGTA
egr-miR-10     CAAACTCGGGTCTACAGGGTG
emu-miR-10     CAAACTCGGGTCTACAGGGTG
lgi-miR-10     CAAATTCGGATCTACAGGGTA
```

---

**gsa-mir-277b**

ENERGY = -19.0

|             |        |      |      |
|-------------|--------|------|------|
| total reads | mature | loop | star |
| 1968        | 1243   | 1    | 724  |

Bases 1 to 70

```

      10      20      30
--    UCU-      C  AACAG  U  U
    AUAGAC    ACAUGUAUUU  UAU    GG CA A
    UAUCUG    UGUACGUAAA  AUA    CC GU A
CA    UUUU      U  ACA--  -  G
      60      50      40
```

\*\*\*\*\* \* \* \*

```
gsa_mir_277a    TAAATGCAAAGTATCTGGTATCAT
gsa_mir_277b  TAAATGCATGTTTTTGTCTATAC-
sja-mir-277    TAAATGCATTTTCTGGCCCGTAAC
sme-mir-277a  TAAATGCAC--TATCGGATATGAC
egr-mir-277   TAAATGCATTTTCTGGCCCGTAAC
emu-mir-277   TAAATGCATTTTCTGGCCCGTAAC
```

---

**gsa-mir-1992**

ENERGY = -18.9

|             |        |      |      |
|-------------|--------|------|------|
| total reads | mature | loop | star |
| 743         | 741    | 0    | 2    |

Bases 1 to 64

```
          10      20      30
-   U   -   UU   CCUUA
GUGGC AUG UUCAUUGCU GAUA   G
UACUG UAC GAGUUGACGA CUAU   U
G   U   U   --   UUGCGU
      60      50      40
```

\*\*\*\*\* \*\* \*\*

|              |                         |
|--------------|-------------------------|
| gsa-mir-1992 | TCAGCAGTTGAGTCATTGTCATG |
| sme-miR-1992 | TCAGCAGTTGTTCCATTGAC--- |
| cla-mir-1992 | TCAGCAGTTGTACCACTGATGTG |
| cte-mir-1992 | TCAGCAGTTGTACCACTGATGTG |
| lgi-mir-1992 | TCAGCAGTTGTACCACTGATTTG |

---

# gsa-mir-31\*

ENERGY = -19.6

| total reads | mature | loop | star |
|-------------|--------|------|------|
| 275         | 253    | 0    | 22   |

Bases 1 to 55

```

      10      20
--U      U  U  C      U  CU
      GGCAAGA CA GG AUAGC GAG  G
      UUGUUCU GU CC UAUCG CUC  G
AAC      U  -  A      C  AU
      50      40      30
```

```

*****
gsa-mir-31  TGGCAAGATCATGGCATAGCTGAGCTG-----GTACTCCGCTATACCTGTTCTTGTTCAA
cte-mir-31  AGGCAAGATGTTGGCATAGCTGATTTACAC-TCTGTGGTCAGCTCTGTCGCATATTGCCCCC
lgi-mir-31  AGGCAAGATGTTGGCATAGCTGAGTCATATATGAACCATCAGCTGTGTCTCATATTGCTATC
sme-mir-31b1 AGGCAAGATGCTGGCATAGCTGATAAAC-TATTTATTACCAGCTATTCAGGATCTTTCCCTG
sme-mir-31b2 AGGCAAGATGCTGGCATAGCTGATAAAC-TATTTATTACCAGCTATTCAGGATCTTTCCATG
*****
```

---

**gsa-mir-2163**

ENERGY = -24.6

|             |        |      |      |
|-------------|--------|------|------|
| total reads | mature | loop | star |
| 67          | 38     | 0    | 29   |

Bases 1 to 58

```

          10      20
--C  UG  U      GU      GCU
   C  CU GUGGGGCU AUGCAAUC  A
   G  GA UAUUCCGA UACGUUAG  G
UCC GU  U      --      GCA
          50      40      30
```

\*\*\*\*\* \* \*\*\*

```
gsa-mir-153      TTGCATAGCCTTATTAGTGGCCT
cte-mir-153      TTGCATAGTCACAAAAGTGATCG
lgi-mir-153      TTGCATAGTCACAAAAGTGATCG
sme-miR-2163     TTGCATAGTCTATTAAGTTGGT-
```

---



## gsa-mir-nov-1

ENERGY = -26.5

| total reads | mature | loop | star |
|-------------|--------|------|------|
| 6555        | 4691   | 2    | 1862 |

Bases 1 to 74

```

      10      20      30
--C C      AU C      CAUCUC      CA
  GG GCUUUG UGU CACACUGAAU      UGCA U
  CC UGGAAC ACA GUGUGACUUG      ACGU G
AUA U      -- C      CA----      UU
  70      60      50      40
```

---

## gsa-mir-nov-2

ENERGY = -17.1

| total reads | mature | loop | star |
|-------------|--------|------|------|
| 1484        | 1483   | 0    | 1    |

Bases 1 to 52

```

      10      20
-      - AA      AACUUA
GAAGGACA GG UAAUGAG      \
CUUUCUGU CC AUUACUC      G
A      A C-      AUAGUA
  50      40      30
```

---

### gsa-mir-nov-3

ENERGY = -9.4

|             |        |      |      |
|-------------|--------|------|------|
| total reads | mature | loop | star |
| 829         | 770    | 0    | 59   |

Bases 1 to 49

```

      10      20
UG -   CU   A  CC  ACG
   C GGUAUA GAUG GU  C  A
   G CCAUAU CUGC CA  G  G
UG U     --   G  AA  CAA
      40      30
```

---

### gsa-mir-nov-4

ENERGY = -14.6

|             |        |      |      |
|-------------|--------|------|------|
| total reads | mature | loop | star |
| 686         | 685    | 0    | 1    |

Bases 1 to 80

```

      10      20      30
GA      A C  ----   C  UU  A  AUU
   UCUUUAACAA U UC   CGUC AUCUU UUA GAA \
   AGAAAUUGUU A AG   GUAG UAGAA AAU CUU  A
--      A A  CAAU   U   C-  C  AAC
   80      70      60      50
```

---

### gsa-mir-nov-5

ENERGY = -23.2

| total reads | mature | loop | star |
|-------------|--------|------|------|
| 607         | 592    | 0    | 15   |

Bases 1 to 78

```

          10          20          30
---AUC      -   A      ----      G UUU
      CAUGUUU UAGA AAUGGUGG  AUUAUU A  U
      GUACAAG GUCU UUGCCACC  UAAUAG U  U
AAAUGU      U   G      ACUU      G UUA
          70          60          50          40
```

---

### gsa-mir-nov-6

ENERGY = -3.9

| total reads | mature | loop | star |
|-------------|--------|------|------|
| 353         | 341    | 0    | 12   |

Bases 1 to 53

```

          10          20
--      A  U  U  C      G  UU
      AUUAA UG UU U UACGU UU \
      UAGUU AC AA A AUGUA AA A
UU      C  U  U  U      G  AA
50          40          30
```

---

**gsa-mir-nov-7**

ENERGY = -19.2

total reads **mature** loop **star**  
267 265 0 2

Bases 1 to 111

```

      10      20      30      40      50
--- U      U      UUC      CAUAA- U G      AA---      AUAAA
      G GAGGGAA GGUUU GAUUGA      UU CA UUUUAU      UUCU      \
      C CUUCCUU UCAAA CUAAUU      AA GU AAAAUA      AAGA      A
UGA -      C      UCU      CCCAAG C A      GCAAA      AAAGA
      100      90      80      70      60
```

---

**gsa-mir-nov-8**

ENERGY = -32.2

total reads **mature** loop **star**  
163 158 1 4

Bases 1 to 68

```

      10      20      30
---      UG      A      A C      C
      GGGGAAUC GAUC GUGGCU GUG AUUGG U
      CUCCUUAG UUAG CGCUGA CAU UAACC U
UCC      CU      -      C C      G
      60      50      40
```

---

### gsa-mir-nov-9

ENERGY = -10.9

|             |        |      |      |
|-------------|--------|------|------|
| total reads | mature | loop | star |
| 139         | 137    | 1    | 1    |

Bases 1 to 62

|    |         |      |       |         |
|----|---------|------|-------|---------|
|    | 10      | 20   | 30    |         |
| UC | UU      | C    | A     | U- AAAU |
|    | UUGUUUU | UCAA | AACGA | UA UC \ |
|    | AACAAAA | AGUU | UUGC  | AU AG A |
| U- | U-      | A    | A     | CU AUUU |
| 60 | 50      | 40   |       |         |

---

### gsa-mir-nov-10

ENERGY = -18.9

|             |        |      |      |
|-------------|--------|------|------|
| total reads | mature | loop | star |
| 116         | 98     | 0    | 18   |

Bases 1 to 61

|     |     |       |             |       |
|-----|-----|-------|-------------|-------|
|     | 10  | 20    | 30          |       |
| --U | U   | U C   | CG          | AAU   |
|     | UCU | GAUCU | G GAGUGAUUC | AUG \ |
|     | AGG | CUAGA | C CUUACUAAG | UAC A |
| GUC | U   | U U   | --          | AGA   |
| 60  | 50  | 40    |             |       |

---

### gsa-mir-nov-11

ENERGY = -10.9

|             |        |      |      |
|-------------|--------|------|------|
| total reads | mature | loop | star |
| 87          | 84     | 0    | 3    |

Bases 1 to 58

```

      10      20
--   - U      A      AU-      A
    GUAA G GAUGA GAAAU AAUUGGA \
    CAUU C CUGCU CUUUA UUAUUU A
GA   U C      -      AUC      U
      50      40      30
```

---

### gsa-mir-nov-12

ENERGY = -22.8

|             |        |      |      |
|-------------|--------|------|------|
| total reads | mature | loop | star |
| 53          | 38     | 0    | 15   |

Bases 1 to 75

```

      10      20      30
---A      UUC      A      ACCCAAC      CUC
    GAUGUA  UUGGC CGAGA      AAUCGA \
    CUACGU  AAUCG GCUCU      UUAGCU U
UUCG      UAA      -      AAACU--      AUC
      70      60      50      40
```

---

### gsa-mir-nov-13

ENERGY = -27.2

| total reads | mature | loop | star |
|-------------|--------|------|------|
| 37          | 26     | 0    | 11   |

Bases 1 to 70

```

      10      20      30
--A  A      ----      C
  AAGU AUCUUUAAUCUGAUUGG  UUUUCAU G
  UUCG UAGAGGUUAGAUUAACC  AGAAGUA A
UUC  G      UUAU      A
      60      50      40
```

---

### gsa-mir-nov-14

ENERGY = -33.5

| total reads | mature | loop | star |
|-------------|--------|------|------|
| 33          | 19     | 1    | 13   |

Bases 1 to 100

```

      10      20      30      40
---CCAAUU  C      UG UG      AU  A  GU  AA
  UCUGU CACUACA  G  AAUGUG  CUAG  CUCU  UUUU  \
  AGACA GUGGUGU  U  UUACAC  GGUC  GAGG  GGAA  A
GGAAAAUU  U      UU GU      --  G  UU  AU
      90      80      70      60
```

---

### gsa-mir-nov-15

ENERGY = -18.4

| total reads | mature | loop | star |
|-------------|--------|------|------|
| 24          | 23     | 0    | 1    |

Bases 1 to 67

```

      10      20      30
U      AG      A      C CA CAU
  AGACAAGA AAUGAA GAUUU AC GC C
  UUUGUUUU UUACUU CUAAA UG CG A
-      CU      A      C UC UAA
      60      50      40
```

---

### gsa-mir-nov-16

ENERGY = -25.5

| total reads | mature | loop | star |
|-------------|--------|------|------|
| 24          | 14     | 0    | 10   |

Bases 1 to 64

```

      10      20
---A      U      CA      ----- C
      GAGGAAUC GGAU GUGGCA      UUGG U
      CUCCUUAG CUUG CGCUGU      AACC U
AUCC      -      AG      UCUUAU      G
      60      50      40      30
```

---



### gsa-mir-nov-17

ENERGY = -19.5

|             |        |      |      |
|-------------|--------|------|------|
| total reads | mature | loop | star |
| 20          | 18     | 0    | 2    |

Bases 1 to 61

```

      10      20
--  -  C  U  --  GCA
  UGUA CUGG UGU CCAUCA AUUAG  G
  ACAU GACC ACA GGUGGU UGAUU  G
AU  A  U  C  AC  AUU
60      50      40      30
```

---

### gsa-mir-nov-18

ENERGY = -22.4

|             |        |      |      |
|-------------|--------|------|------|
| total reads | mature | loop | star |
| 19          | 18     | 0    | 1    |

Bases 1 to 72

```

      10      20      30
----  G      U  U  AA----  UU
  GU AAAGAGGUU GGA UGAAAU  GGGUC  \
  CG UUUCUCCAA CUU ACUUUA  CUUAG  U
UUAA -      U  U  CAUUAG  UA
70      60      50      40
```

---

### gsa-mir-nov-19

ENERGY = -14.3

| total reads | mature | loop | star |
|-------------|--------|------|------|
| 18          | 15     | 0    | 3    |

Bases 1 to 65

```

      10      20      30
--      G- C      A G      C CUA
  UAUUUU C UAUUUU CA ACAGA AC  A
  AUAAGA G AUAAGU GU UGUCU UG  U
UU      GA A      G G      C AAC
      60      50      40
```

---

### gsa-mir-nov-20

ENERGY = -24.9

| total reads | mature | loop | star |
|-------------|--------|------|------|
| 18          | 13     | 0    | 5    |

Bases 1 to 58

```

      10      20
GC U  A      A      AAGUC
  G CUC GAGGUC AACACAGU  A
  C GAG CUCCGG UUGUGUCG  U
GU U  C      A      AAUUA
      50      40      30
```

---

**gsa-mir-nov-21**

ENERGY = -18.2

|             |        |      |      |
|-------------|--------|------|------|
| total reads | mature | loop | star |
| 15          | 14     | 0    | 1    |

Bases 1 to 67

|       |          |    |     |      |    |
|-------|----------|----|-----|------|----|
|       | 10       | 20 |     | 30   |    |
| -UC   | UUUA     | A  | -   | -    | UC |
| GCGUA | AGGUUUC  | UC | GAG | AAUG | C  |
| CGCAU | UUUAAAGU | AG | CUU | UUAC | U  |
| CUA   | UCAG     | A  | A   | A    | UU |
|       | 60       | 50 | 40  |      |    |
